# Supplementary material for: Exercising with Baxter: preliminary support for assistive social-physical human-robot interaction
Source: Springer Nature journal article supplement (doi:10.1186/s12984-020-0642-5), 2020-02-17

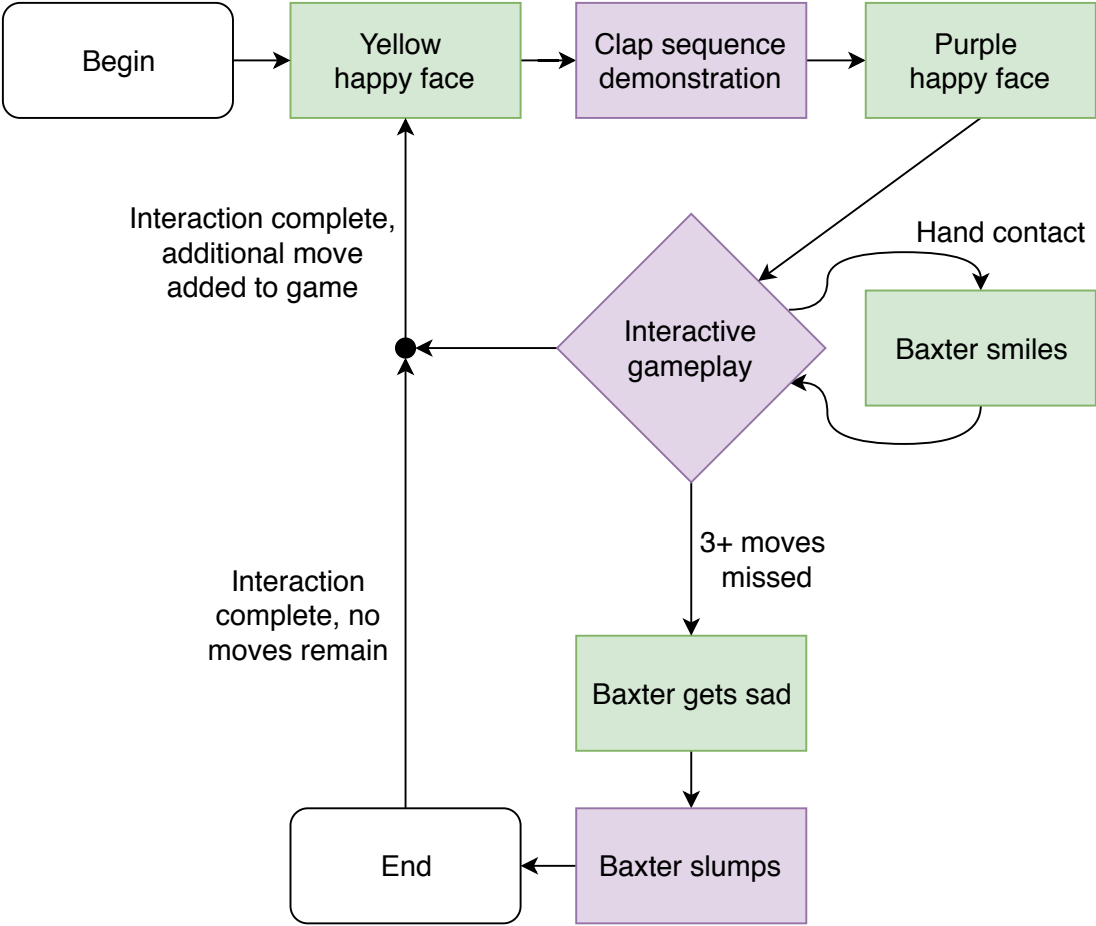

Supplement: MOESM11 [file 17715874]
