# Supplementary material for: Exercising with Baxter: preliminary support for assistive social-physical human-robot interaction
Source: Springer Nature journal article supplement (doi:10.1186/s12984-020-0642-5), 2020-02-17
Supplement: MOESM18 [file 17715874]

# Opening Evaluation

Subject number \_\_\_\_\_

Please rate how much you agree or disagree with each of the following statements by marking your response on each axis with an "x":

I think using the robot is a good idea.

|\_\_\_\_\_|

Strongly Disagree

Strongly Agree

I am afraid to make mistakes while using the robot.

|\_\_\_\_\_|

Strongly Disagree

Strongly Agree

I am afraid to break something while using the robot.

|\_\_\_\_\_|

Strongly Disagree

Strongly Agree

People would be impressed if I had such a robot.

|\_\_\_\_\_|

Strongly Disagree

Strongly Agree

Robots are nice to work with.

|\_\_\_\_\_|

Strongly Disagree

Strongly Agree

I am afraid that I could lose my job because of a robot.

|\_\_\_\_\_|

Strongly Disagree

Strongly Agree

I could cooperate with the robot.

---

Strongly Disagree

Strongly Agree

I think the robot is easy to use.

---

Strongly Disagree

Strongly Agree

I like the presence of the robot.

---

Strongly Disagree

Strongly Agree

I could do activities with this robot.

---

Strongly Disagree

Strongly Agree

I feel threatened by the robot.

---

Strongly Disagree

Strongly Agree

This robot would be useful for me.

---

Strongly Disagree

Strongly Agree

This robot could help me.

---

Strongly Disagree

Strongly Agree

This robot could support me.

|\_\_\_\_\_|

Strongly Disagree

Strongly Agree

I consider the robot to be a social agent.

|\_\_\_\_\_|

Strongly Disagree

Strongly Agree

I feel understood by the robot.

|\_\_\_\_\_|

Strongly Disagree

Strongly Agree

I feel comfortable while interacting with the robot.

|\_\_\_\_\_|

Strongly Disagree

Strongly Agree

I could work with the robot, if someone helped me.

|\_\_\_\_\_|

Strongly Disagree

Strongly Agree

I could work with the robot without any help.

|\_\_\_\_\_|

Strongly Disagree

Strongly Agree

I could work with the robot, if I had good initial training.

|\_\_\_\_\_|

Strongly Disagree

Strongly Agree

I trust the robot.

---

Strongly Disagree

Strongly Agree

I would follow the example of the robot.

---

Strongly Disagree

Strongly Agree
