# Supplementary material for: Exercising with Baxter: preliminary support for assistive social-physical human-robot interaction
Source: Springer Nature journal article supplement (doi:10.1186/s12984-020-0642-5), 2020-02-17
Supplement: MOESM19 [file 17715874]

# Game Survey

Subject number \_\_\_\_\_

Game number \_\_\_\_\_

During this game, how hard were you exercising?

\_\_\_\_\_

Not at All

Maximal Amount

(On this scale, a low rating would represent very very light exercise and a high rating would represent very very hard exercise, with many levels in between)

Please rate your feelings while playing this game on the following scales:

\_\_\_\_\_

Unhappy/Sad

Happy/Elated

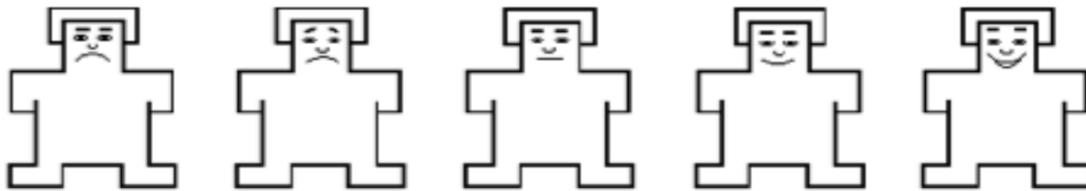

\_\_\_\_\_

Calm/Bored

Stimulated/Involved

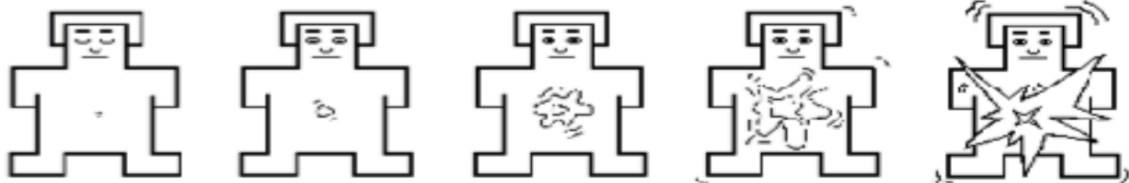

\_\_\_\_\_

Not in Control

In Control/Dominant

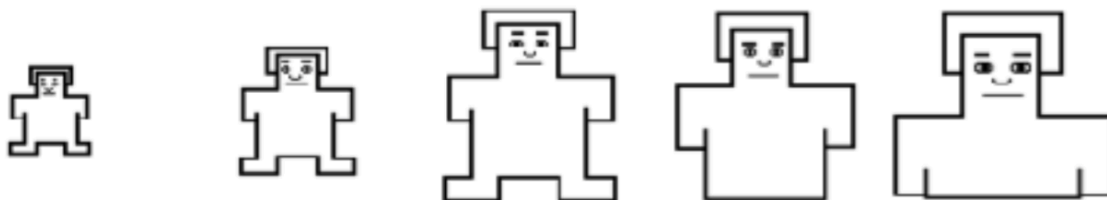

How much pain did you experience while playing this game?

|\_\_\_\_\_|

No Pain

Most Severe Pain Imaginable

(On this scale, the lowest rating would reflect no pain, a rating in the leftmost region would reflect mild pain, a rating in the middle region would reflect moderate pain, and a rating in the rightmost region would reflect severe pain. The corresponding pain face scale below provides another pain level representation.)

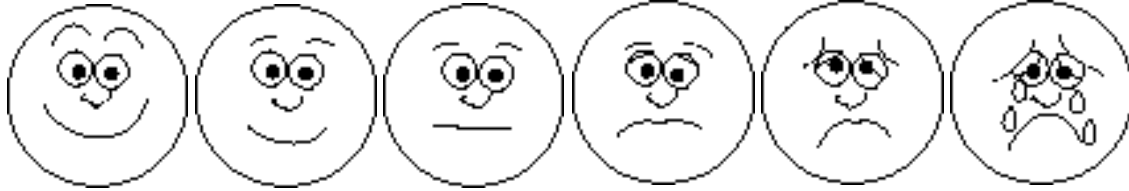

How safe did this robot behavior seem?

|\_\_\_\_\_|

Very Unsafe

Very Safe

How much did you enjoy this set of interactions?

|\_\_\_\_\_|

Very Little

Very Much

How engaged did you feel throughout this set of interactions?

|\_\_\_\_\_|

Very Unengaged

Very Engaged

How well did you perform during this set of interactions?

|\_\_\_\_\_|

Very Badly

Very Well

How well did the robot perform during this set of interactions?

---

Very Badly

Very Well

How rushed did you feel during this set of interactions?

---

Very Rushed

Not at All Rushed

How calm did you feel during this set of interactions?

---

Not at All Calm

Very Calm

What comments do you have about this interaction with the robot?

---

---

---

---
