# Supplementary material for: Exercising with Baxter: preliminary support for assistive social-physical human-robot interaction
Source: Springer Nature journal article supplement (doi:10.1186/s12984-020-0642-5), 2020-02-17
Supplement: MOESM21 [file 17715874]

# Demographic Information

Subject number \_\_\_\_\_

Group

A

B

How old are you? \_\_\_\_\_

What is your birthdate? (day, month, and year) \_\_\_\_\_

What is your gender?

Male

Female

Other

What is your handedness?

Left-handed

Right-handed

Ambidextrous

(please elaborate: \_\_\_\_\_)

What is your profession? \_\_\_\_\_

Is your education/background technical?

Yes

No

What is your experience level with robots? (please mark response with an "x")

|\_\_\_\_\_|

No Experience

Expert-Level Experience

What is your experience level with Baxter? (please mark response with an "x")

|\_\_\_\_\_|

No Experience

Expert-Level Experience

What is your hometown (city, state, country)? \_\_\_\_\_
